# Supplementary material
Source: PubMed Central journal article supplement (PMC6727210)
Supplement: es8b05555_si_001.pdf [file es8b05555_si_001.pdf]

**Supporting Information related to manuscript:**

Particulate mass and non-volatile particle number emissions from marine engines using low-sulfur fuels, natural gas or scrubbers

Kati Lehtoranta<sup>1\*</sup>, Päivi Aakko-Saksa<sup>1</sup>, Timo Murtonen<sup>1</sup>, Hannu Vesala<sup>1</sup>, Leonidas Ntziachristos<sup>2</sup>,  
Topi Rönkkö<sup>2</sup>, Panu Karjalainen<sup>2</sup>, Niina Kuittinen<sup>2</sup>, Hilkka Timonen<sup>3</sup>

Pages 2, Figures 2

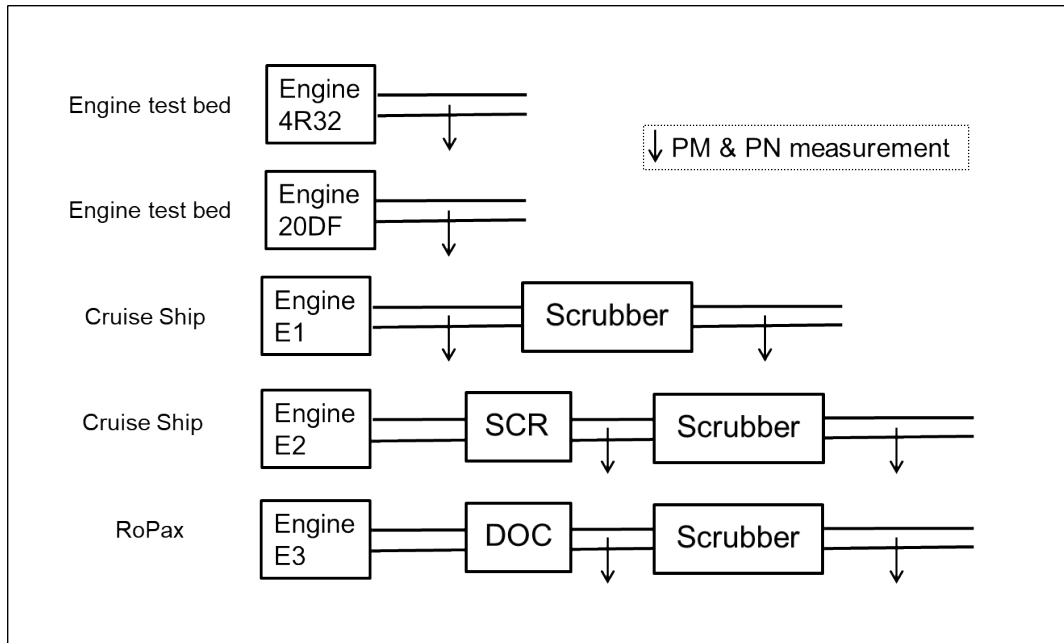

Figure S1 A schematic of the layout of all engines tested on the engine test bed and on board.

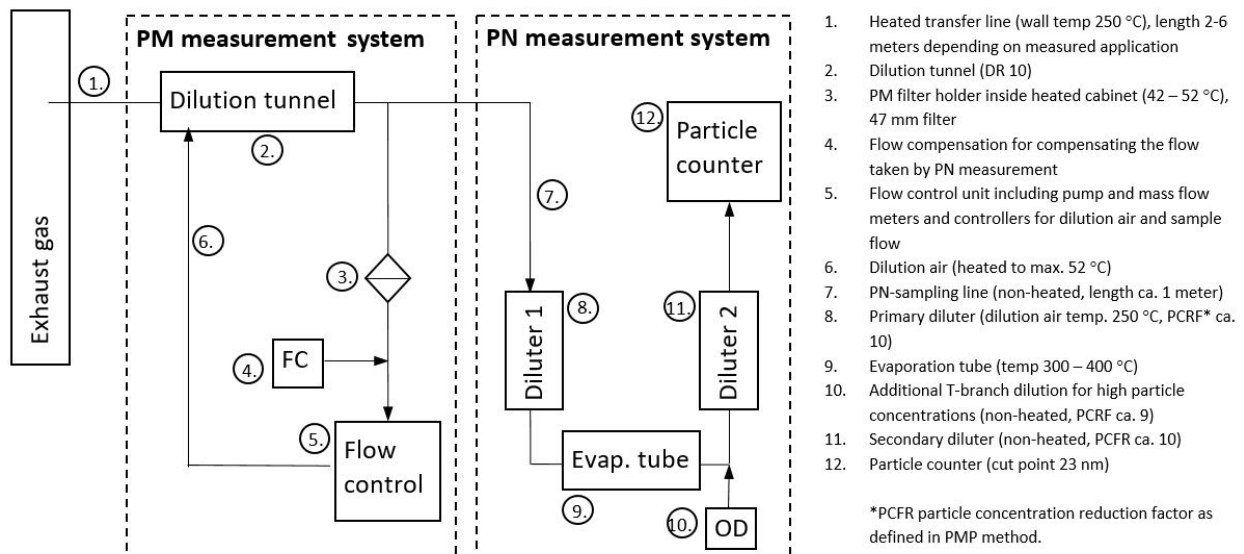

Figure S2 PM measurement system according to ISO8178:2006 and the “PMP” PN (non-volatiles >23) measurement system.
